# Supplementary material for: Tuning oxygen vacancies in MoS2@MoO2 hierarchical tubular heterostructures for high performance lithium-ion batteries
Source: Royal Society of Chemistry journal article supplement (doi:10.1039/d2nj03672j), 2022-01-01
Supplement: d2nj03672j1.pdf [file d2nj03672j1.pdf]

## Supporting Information

### Tuning oxygen vacancies in MoS<sub>2</sub>@MoO<sub>2</sub> hierarchical tubular heterostructure for high performance lithium-ion batteries

Chaofei Guo, Yaomeng Yao, YingNan Cao, Qin Feng, Yifan Zhang\* and Yong Wang\*

Department of Chemical Engineering, School of Environmental and Chemical  
Engineering, Shanghai University, 99 Shangda Road, Shanghai 200444, P. R. China.

\*Corresponding authors: Tel: +86-21-66137723; fax: +86-21-66137725.

Email address: [yongwang@shu.edu.cn](mailto:yongwang@shu.edu.cn); [zyf010626@shu.edu.cn](mailto:zyf010626@shu.edu.cn)

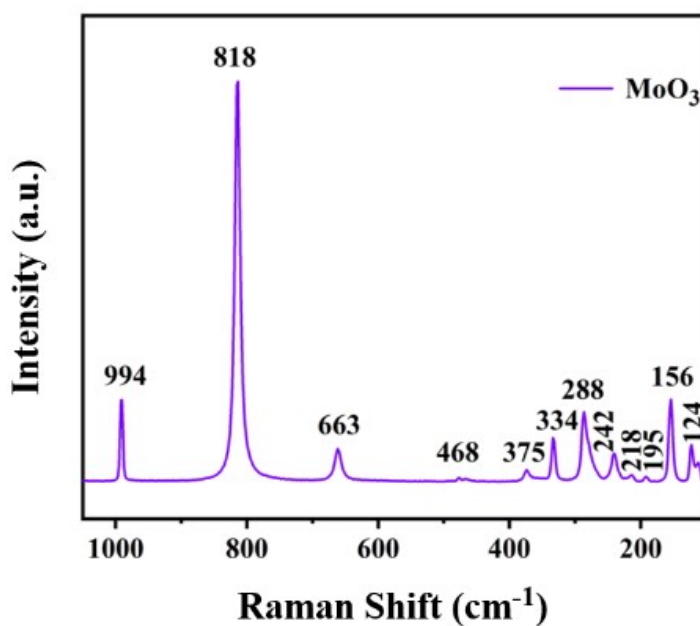

**Fig. S1.** The Raman spectrum of MoO<sub>3</sub>, the peaks at 994, 818, 663, 468, 375, 334, 288, 242, 218, 195, 156 and 124 cm<sup>-1</sup> corresponding to its typical characteristics peaks. The peaks at 996 cm<sup>-1</sup> indicates the stretching vibration of terminal Mo=O (Ag mode) along a- and b-axes, the peak at 819 cm<sup>-1</sup> indicates the doubly coordinated oxygen (Mo-O-Mo) stretching mode, and the triply coordinated oxygen (Mo-O) stretching mode located at 667 cm<sup>-1</sup>).

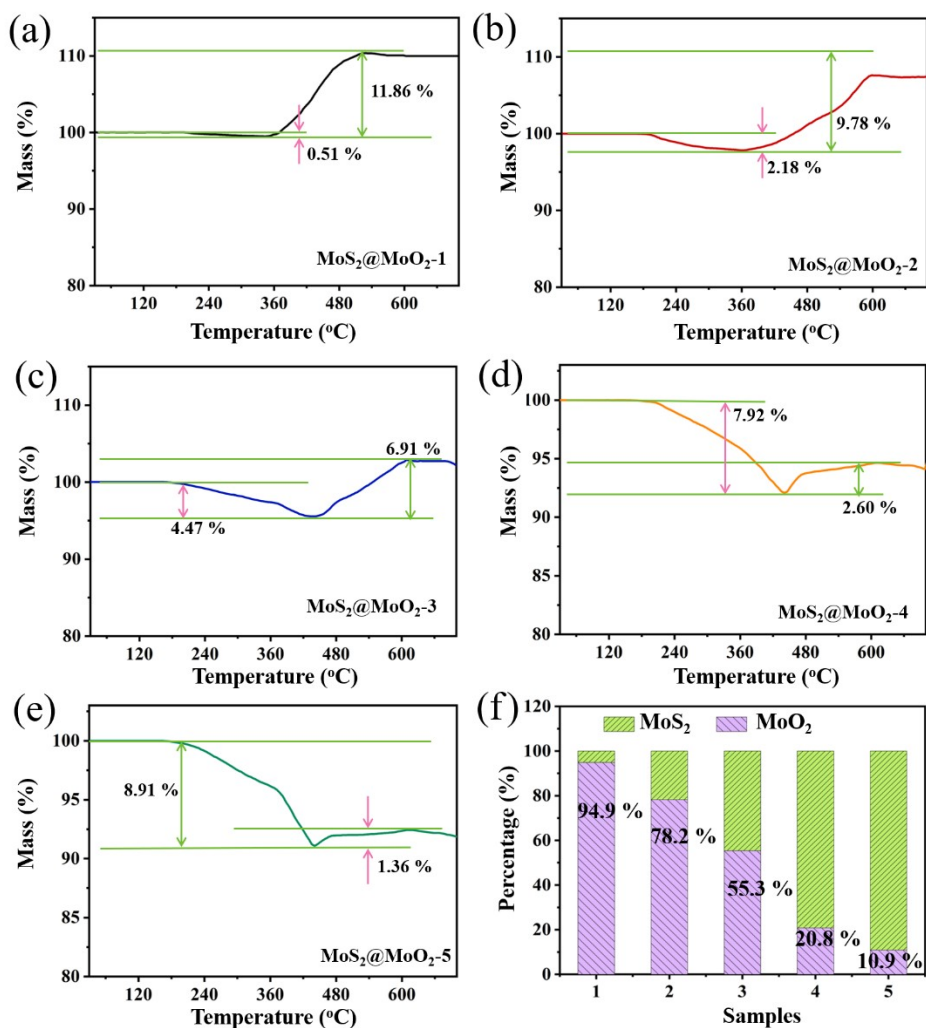

**Fig. S2** TG curves of (a) MoS<sub>2</sub>@MoO<sub>2</sub>-1, (b) MoS<sub>2</sub>@MoO<sub>2</sub>-2, (c) MoS<sub>2</sub>@MoO<sub>2</sub>-3, (d) MoS<sub>2</sub>@MoO<sub>2</sub>-4 and (e) MoS<sub>2</sub>@MoO<sub>2</sub>-5. (f) The weight contents of MoO<sub>2</sub> and MoS<sub>2</sub> in MoS<sub>2</sub>@MoO<sub>2</sub>-1, MoS<sub>2</sub>@MoO<sub>2</sub>-2, MoS<sub>2</sub>@MoO<sub>2</sub>-3, MoS<sub>2</sub>@MoO<sub>2</sub>-4, and MoS<sub>2</sub>@MoO<sub>2</sub>-5 composite.

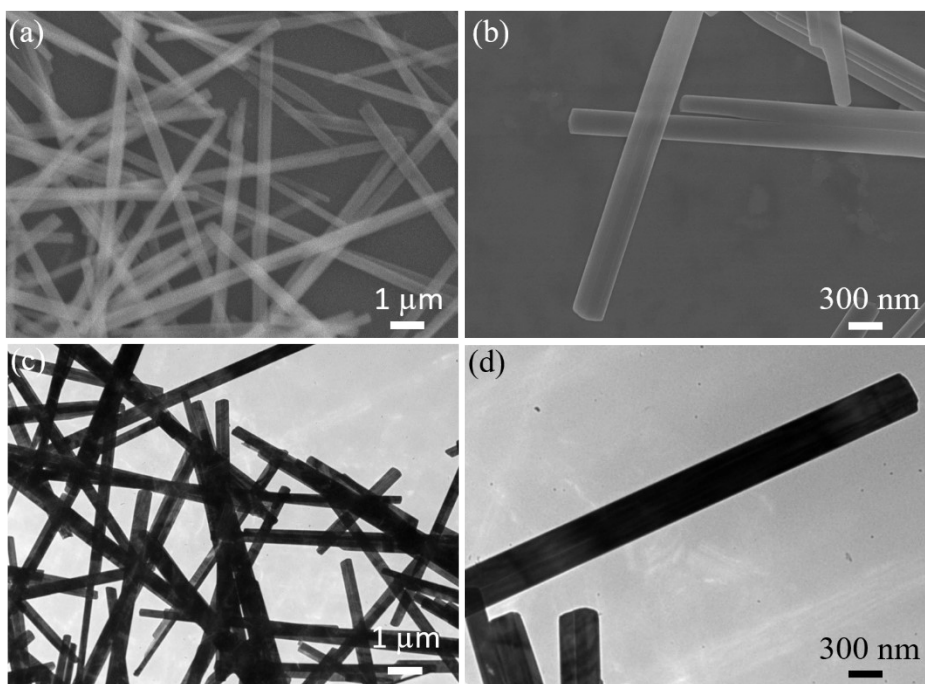

**Fig. S3.** (a-b) SEM images of MoO<sub>3</sub>; (c-d) TEM images of MoO<sub>3</sub>.

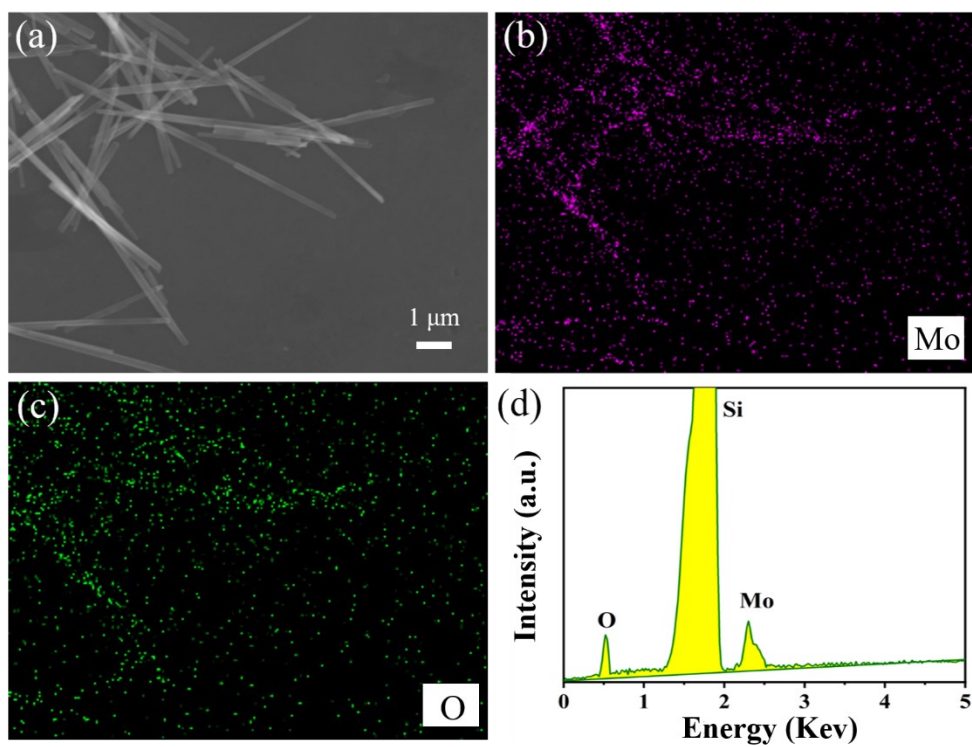

**Fig. S4.** (a) SEM image of MoO<sub>3</sub> and (b-c) the corresponding EDS mapping of Mo and O; (d) EDS spectra of MoO<sub>3</sub>.

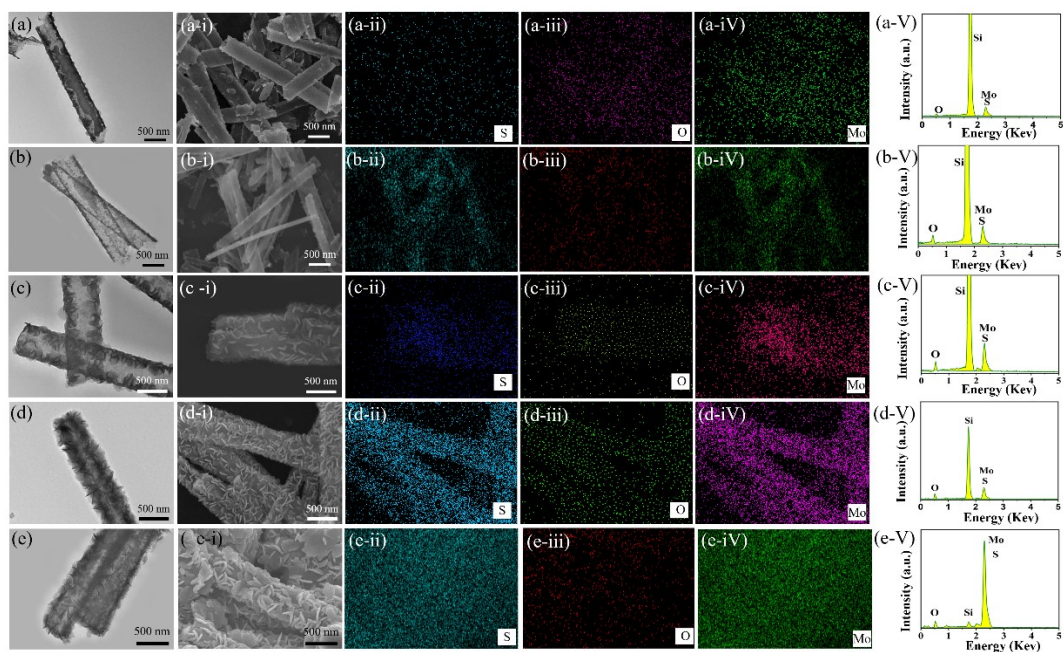

**Fig. S5.** (a) and a-i) TEM and SEM images of  $\text{MoS}_2@\text{MoO}_2-1$ , (a-i)-(a-iV) the elemental mapping images of  $\text{MoS}_2@\text{MoO}_2-1$ , (a-v) EDS spectra; (b) and (b-i) TEM and SEM images of  $\text{MoS}_2@\text{MoO}_2-2$ , (b-i)-(b-iv) the elemental mapping images of  $\text{MoS}_2@\text{MoO}_2-2$ , (b-v) EDS spectra; (c) and (c-i) TEM and SEM images of  $\text{MoS}_2@\text{MoO}_2-3$ , (c-i)-(c-iV) the elemental mapping images of  $\text{MoS}_2@\text{MoO}_2-3$ , (c-v) EDS spectra; (d) and (d-i) TEM and SEM images of  $\text{MoS}_2@\text{MoO}_2-1$ , (d-i)-(d-iV) the elemental mapping images of  $\text{MoS}_2@\text{MoO}_2-1$ , (d-v) EDS spectra; (e) and (e-i) the TEM and SEM images of  $\text{MoS}_2@\text{MoO}_2-1$ , (e-i)-(e-iV) the elemental mapping images of  $\text{MoS}_2@\text{MoO}_2-1$ , (e-v) EDS spectra.

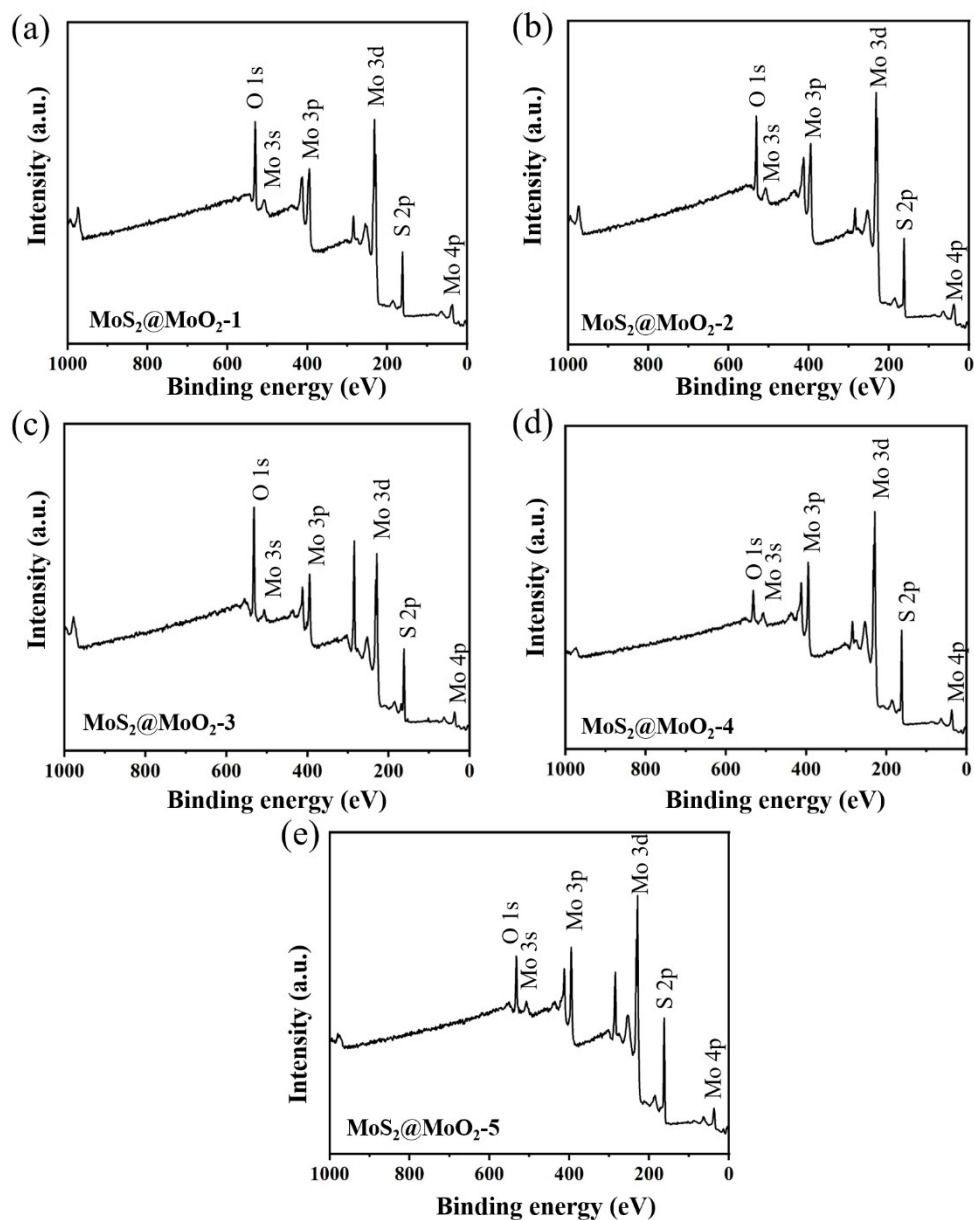

**Fig. S6.** (a-e) The XPS survey spectrum of MoS<sub>2</sub>@MoO<sub>2</sub>-1, MoS<sub>2</sub>@MoO<sub>2</sub>-2, MoS<sub>2</sub>@MoO<sub>2</sub>-3, MoS<sub>2</sub>@MoO<sub>2</sub>-4 and MoS<sub>2</sub>@MoO<sub>2</sub>-5, respectively.

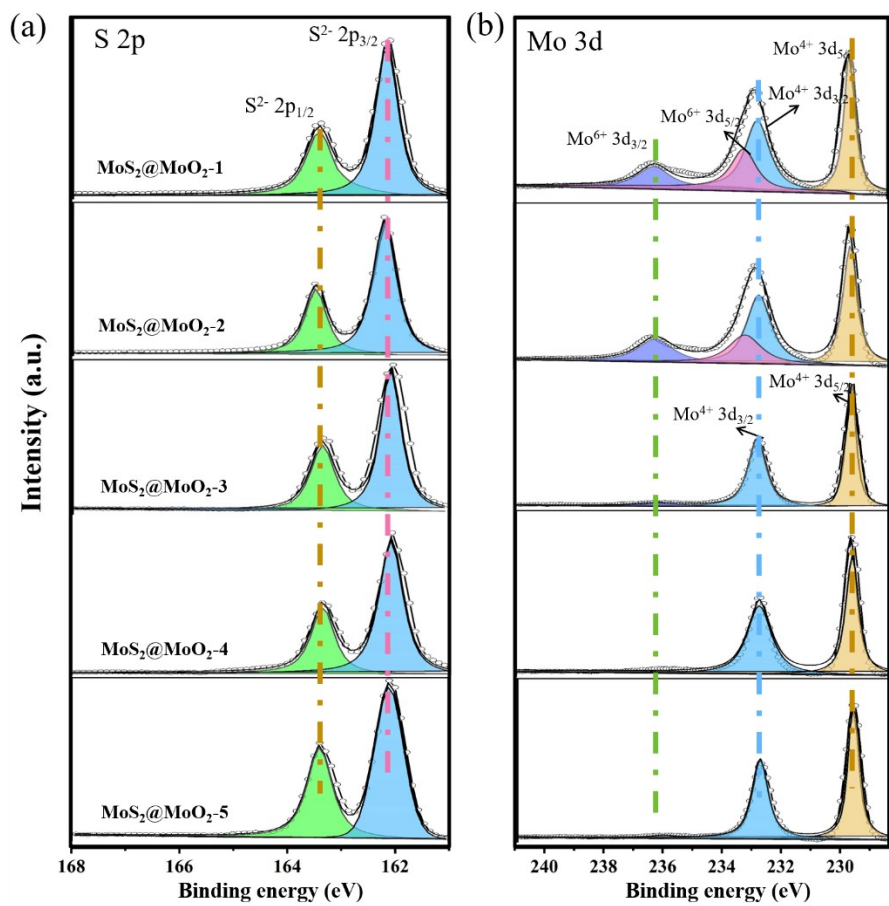

**Fig. S7.** (a) S 2p, and (b) Mo 3d high-resolution spectra of XPS survey spectrum.

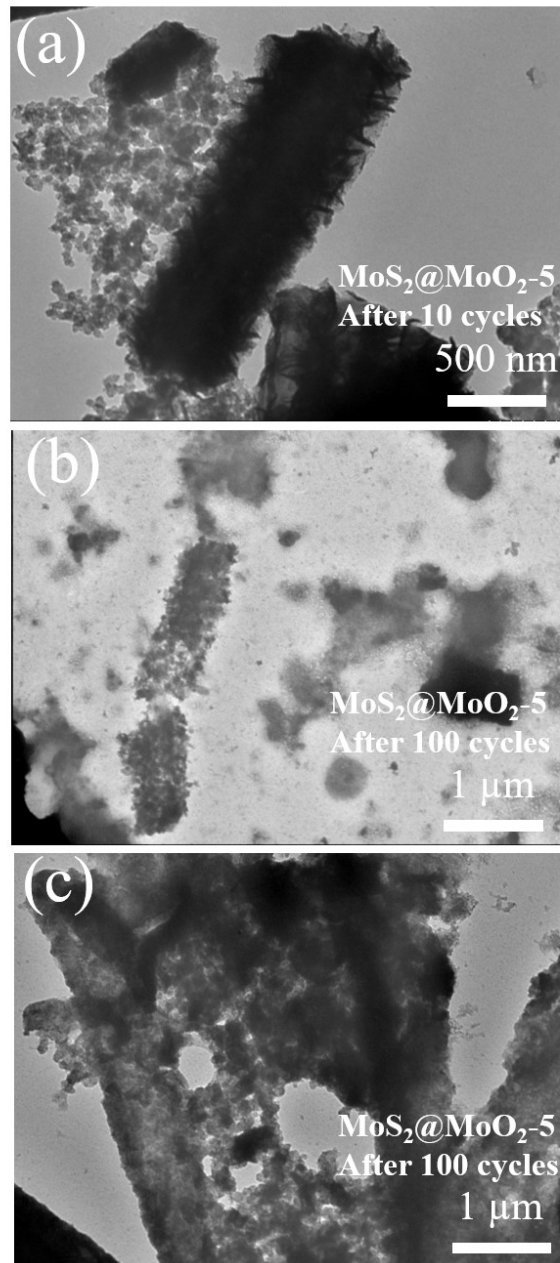

**Fig.S8** TEM images of (a) MoS<sub>2</sub>@MoO<sub>2</sub>-5 electrode after 10 cycles, (b-c) after 100 cycles.



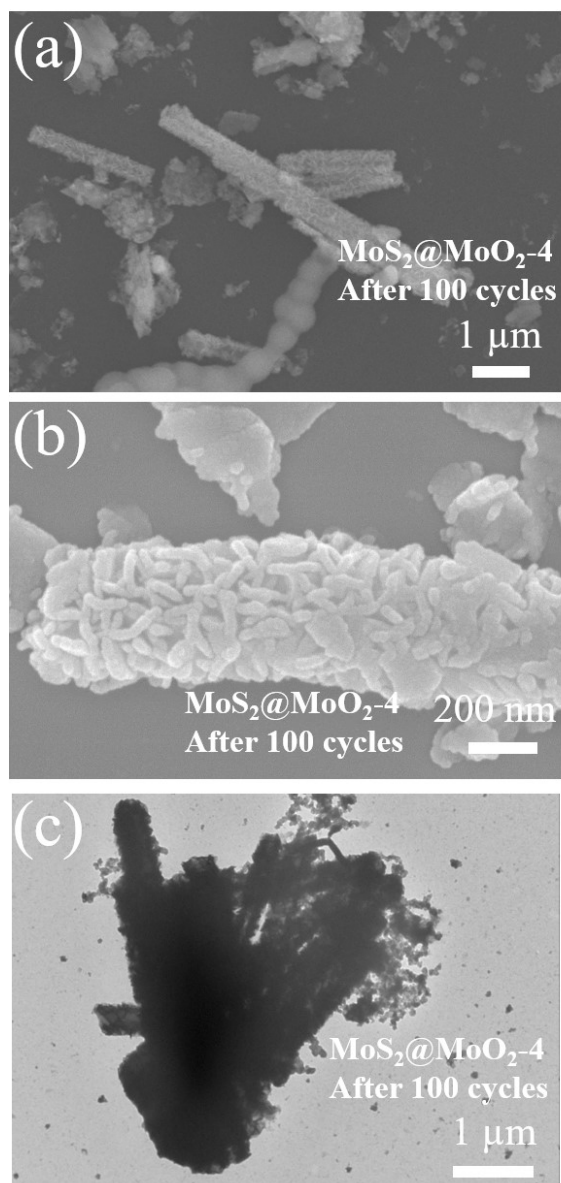

**Fig. S9.** (a-b) SEM images and (c) TEM images of MoS<sub>2</sub>@MoO<sub>2</sub>-4 after 100 cycles.

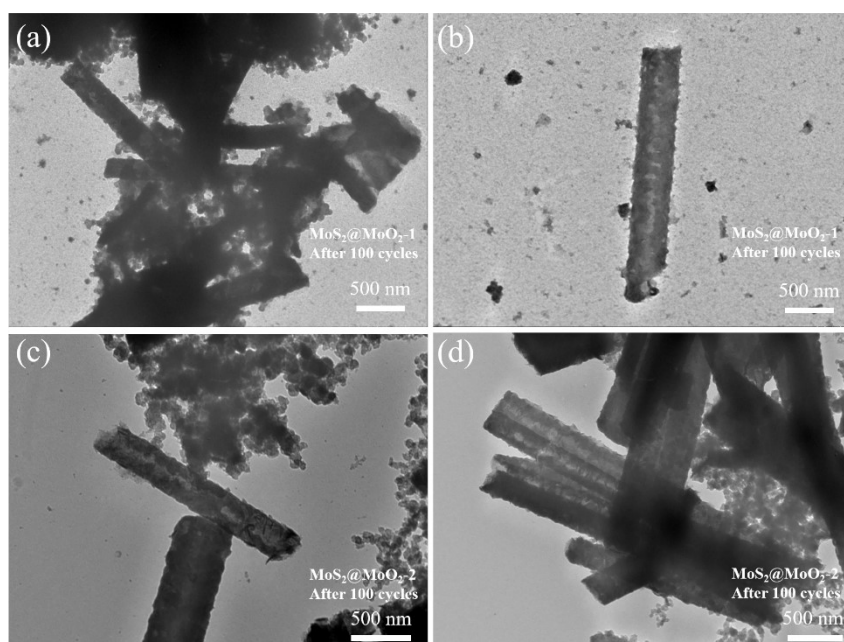

**Fig. S10** (a-b) TEM images of MoS<sub>2</sub>@MoO<sub>2</sub>-1 after 100 cycles; (c-d) TEM images of MoS<sub>2</sub>@MoO<sub>2</sub>-2 after 100 cycles.

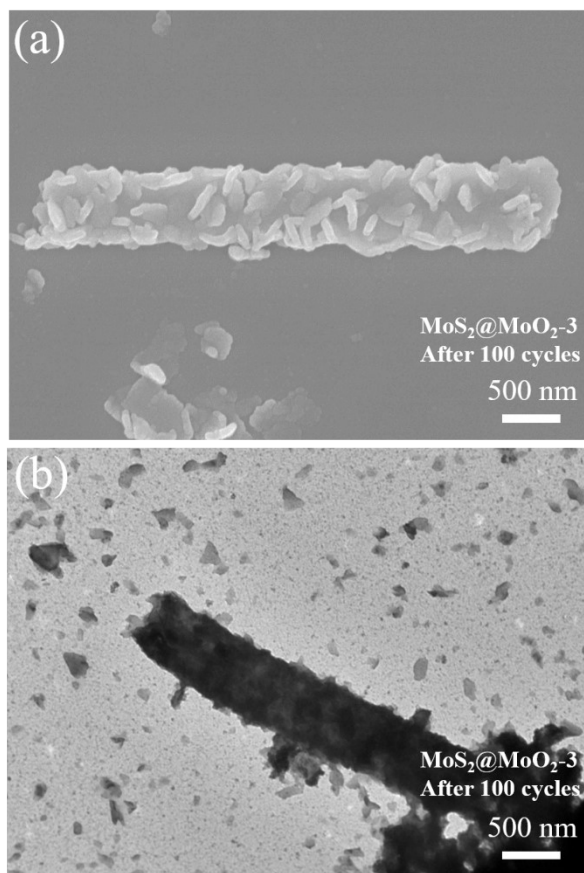

**Fig. S11** (a) SEM image and (b) TEM image of MoS<sub>2</sub>@MoO<sub>2</sub>-3 after 100 cycles.

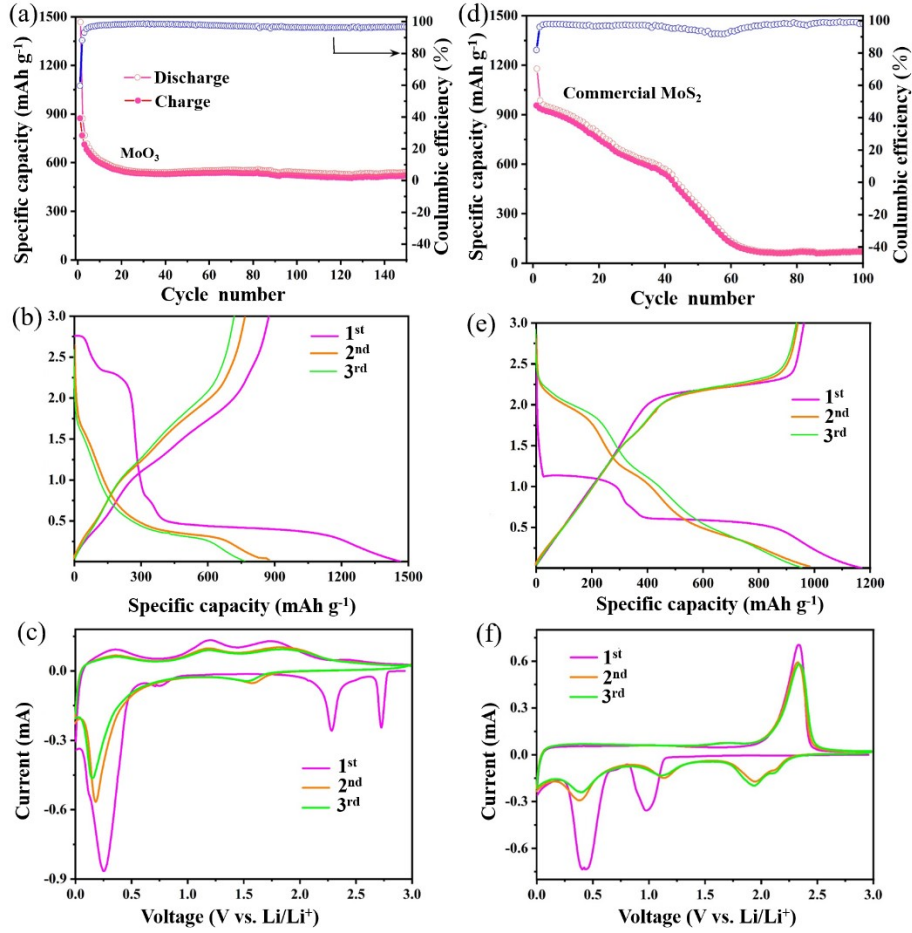

**Fig. S12.** (a) Cycling performances of MoO<sub>3</sub>; (b) Charge-discharge voltage profiles of MoO<sub>3</sub> anodes at a current density of 0.1 C; (c) CV curves of MoO<sub>3</sub> anodes at a scan rate of 0.1 mV s<sup>-1</sup>; (d) Cycling performances of commercial MoS<sub>2</sub>; (e) Discharge-charge voltage profiles of MoS<sub>2</sub> anodes at a current density of 0.1 C; (f) CV curves of MoS<sub>2</sub> anodes at a scan rate of 0.1 mV s<sup>-1</sup>.

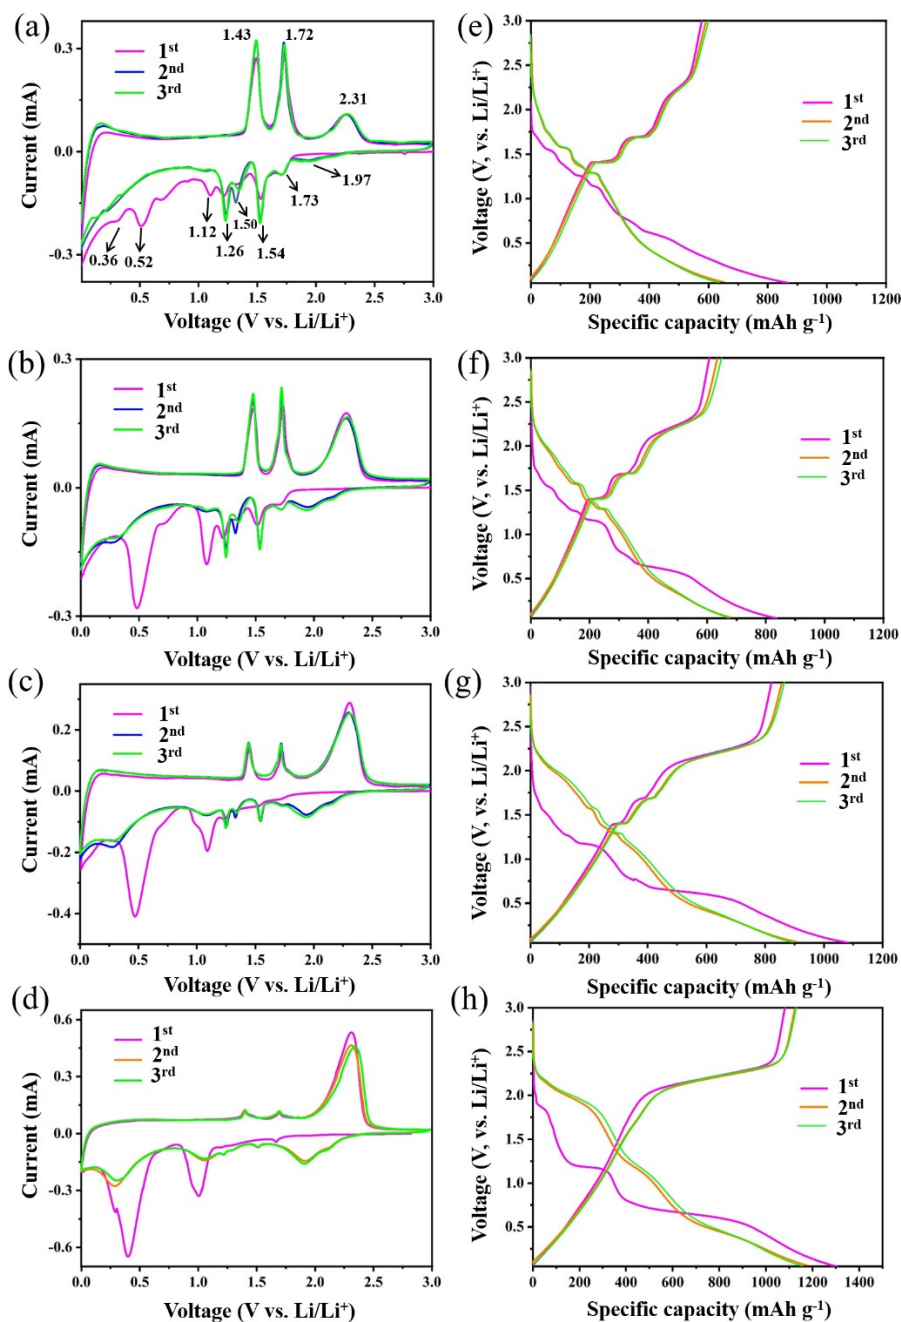

**Fig. S13.** (a) CV curves of  $\text{MoS}_2@\text{MoO}_2\text{-1}$  anodes at a scan rate of  $0.1 \text{ mV s}^{-1}$ ; (b) CV curves of  $\text{MoS}_2@\text{MoO}_2\text{-2}$  anodes at a scan rate of  $0.1 \text{ mV s}^{-1}$ ; (c) CV curves of  $\text{MoS}_2@\text{MoO}_2\text{-3}$  anodes at a scan rate of  $0.1 \text{ mV s}^{-1}$ ; (d) CV curves of  $\text{MoS}_2@\text{MoO}_2\text{-5}$  anodes at a scan rate of  $0.1 \text{ mV s}^{-1}$ ; (e) Discharge-charge voltage profiles of  $\text{MoS}_2@\text{MoO}_2\text{-1}$  anodes at a current density of  $0.1 \text{ C}$ ; (f) Discharge-charge voltage profiles of  $\text{MoS}_2@\text{MoO}_2\text{-2}$  anodes at a current density of  $0.1 \text{ C}$ ; (g) Discharge-charge voltage profiles of  $\text{MoS}_2@\text{MoO}_2\text{-3}$  anodes at a current density of  $0.1 \text{ C}$ ; (h) Discharge-charge voltage profiles of  $\text{MoS}_2@\text{MoO}_2\text{-5}$  anodes at a current density of  $0.1 \text{ C}$ .

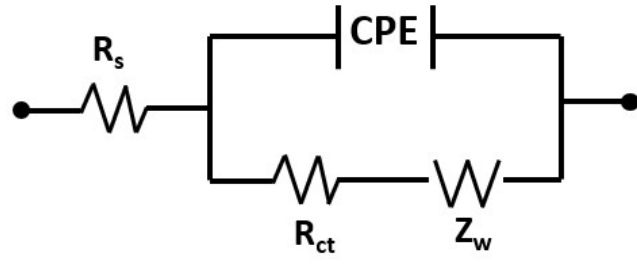

**Fig. S14** Equivalent circuit diagrams.

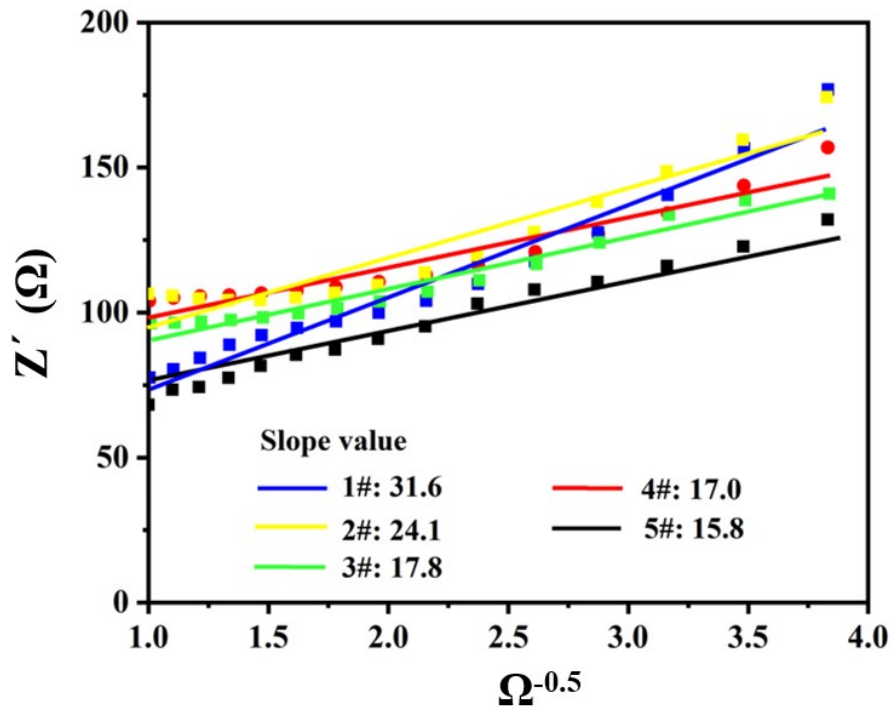

**Fig. S15**  $Z'$  as a function of the  $\omega^{-0.5}$  plot in the low frequency range (the slope of fitting curves is the Warburg factor,  $\sigma_{\omega}$ ).

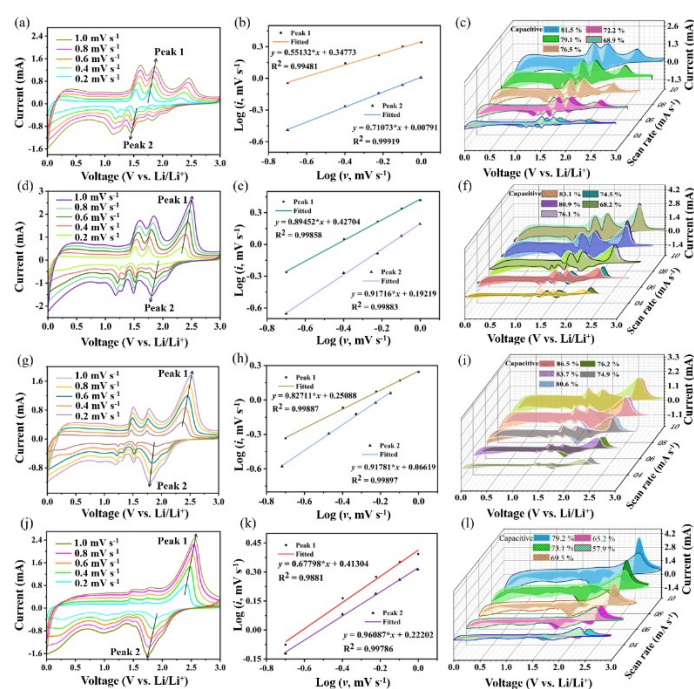

**Fig. S16.** (a) CV curves of the  $\text{MoS}_2@\text{MoO}_2\text{-1}$  electrode at different scan rate ranging from 0.2 to 1.0  $\text{mV s}^{-1}$ ; (b) The relationship of the sweep rate and peak current to derive the capacitive properties of  $\text{MoS}_2@\text{MoO}_2\text{-1}$  electrode; (c) Contribution ratio of capacitive and diffusion controlled behaviors at scan various rates for  $\text{MoS}_2@\text{MoO}_2\text{-1}$  electrode; (d) CV curves of of the  $\text{MoS}_2@\text{MoO}_2\text{-2}$  electrode at different scan rate ranging from 0.2 to 1.0  $\text{mV s}^{-1}$ ; (e) The relationship of the sweep rate and peak current to derive the capacitive properties of  $\text{MoS}_2@\text{MoO}_2\text{-1}$  electrode. (f) Contribution ratio of capacitive and diffusion-controlled behaviors at scan various rates for  $\text{MoS}_2@\text{MoO}_2\text{-2}$  electrode; (g) CV curves of of the  $\text{MoS}_2@\text{MoO}_2\text{-3}$  electrode at different scan rate ranging from 0.2 to 1.0  $\text{mV s}^{-1}$ ; (h) The relationship of the sweep rate and peak current to derive the capacitive properties of  $\text{MoS}_2@\text{MoO}_2\text{-1}$  electrode. (i) Contribution ratio of capacitive and diffusion-controlled behaviors at scan various rates for  $\text{MoS}_2@\text{MoO}_2\text{-3}$  electrode; (j) CV curves of of the  $\text{MoS}_2@\text{MoO}_2\text{-5}$  electrode at different scan rate ranging from 0.2 to 1.0  $\text{mV s}^{-1}$ ; (k) The relationship of the sweep rate and peak current to derive the capacitive properties of  $\text{MoS}_2@\text{MoO}_2\text{-1}$  electrode; (l) Contribution ratio of capacitive and diffusion-controlled behaviors at scan various rates for  $\text{MoS}_2@\text{MoO}_2\text{-5}$  electrode.



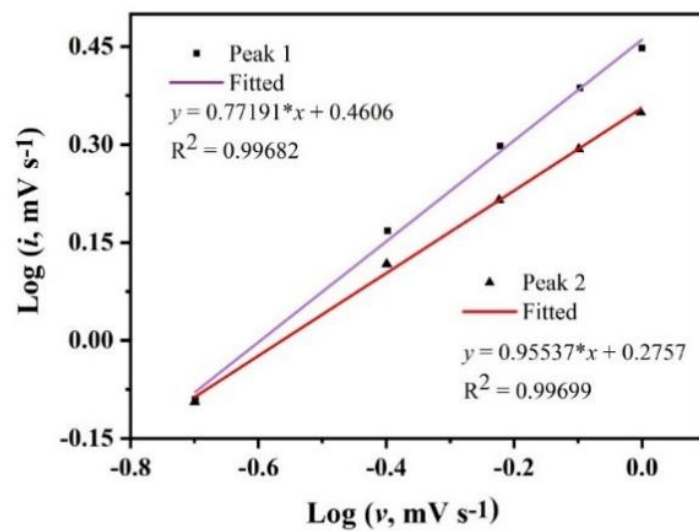

**Fig. S17.** The relationship of the sweep rate and peak current to derive the capacitive properties of MoS<sub>2</sub>@MoO<sub>2</sub>-4 electrode.

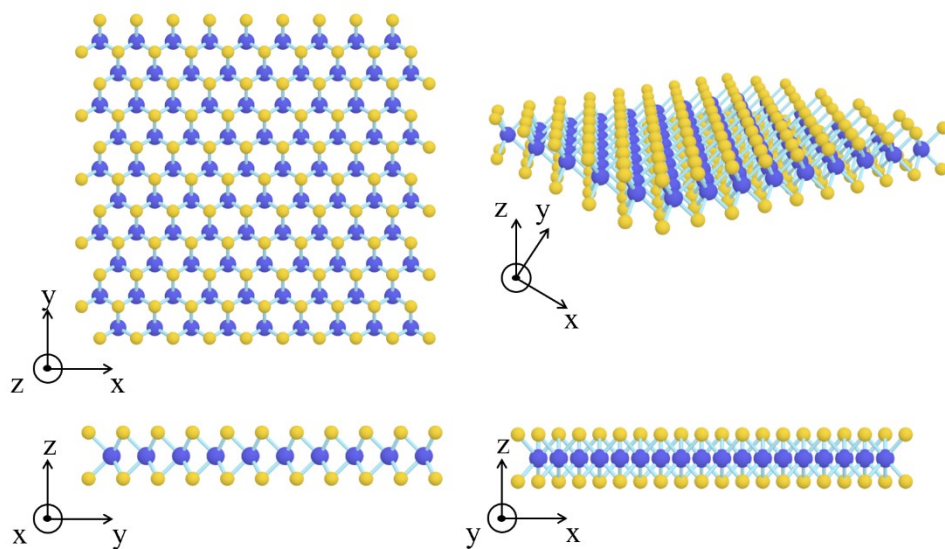

**Fig. S18.** Molecular models of MoS<sub>2</sub>.

**Table S1.** Layer spacing of the series samples of MoS<sub>2</sub>. According to the equations:  $2d\sin\theta=n*\lambda$ , where  $n=1$ ,  $\lambda=0.15406$  nm, and  $2\theta$  is value of {002}.

| Samples                               | $2\theta$ (°) | Sin $\theta$ | d (nm) |
|---------------------------------------|---------------|--------------|--------|
| MoS <sub>2</sub> @MoO <sub>3</sub> -1 | 13.07         | 0.11381      | 0.676  |
| MoS <sub>2</sub> @MoO <sub>3</sub> -2 | 13.30         | 0.11583      | 0.664  |
| MoS <sub>2</sub> @MoO <sub>3</sub> -3 | 13.85         | 0.12062      | 0.638  |
| MoS <sub>2</sub> @MoO <sub>3</sub> -4 | 14.17         | 0.12334      | 0.624  |
| MoS <sub>2</sub> @MoO <sub>3</sub> -5 | 14.30         | 0.12446      | 0.618  |

**Table S2.** Layer spacing of the series samples of MoO<sub>2</sub>. According to the equations:  $2d\sin\theta=n*\lambda$ , where  $n=1$ ,  $\lambda=0.15406$  nm, and  $2\theta$  is value of  $\{011\}$ .

| Samples                               | $2\theta$ (°) | Sin $\theta$ | d (nm) |
|---------------------------------------|---------------|--------------|--------|
| MoS <sub>2</sub> @MoO <sub>3</sub> -1 | 24.80         | 0.21940      | 0.351  |
| MoS <sub>2</sub> @MoO <sub>3</sub> -2 | 25.15         | 0.21771      | 0.353  |
| MoS <sub>2</sub> @MoO <sub>3</sub> -3 | 25.92         | 0.22427      | 0.345  |
| MoS <sub>2</sub> @MoO <sub>3</sub> -4 | 25.94         | 0.22444      | 0.343  |
| MoS <sub>2</sub> @MoO <sub>3</sub> -5 | 26.03         | 0.22520      | 0.342  |

**Table S3.** Summaries of the surface areas, the pore volumes and the average pore diameters of MoO<sub>3</sub>, MoS<sub>2</sub>@MoO<sub>2</sub>-1, MoS<sub>2</sub>@MoO<sub>2</sub>-2, MoS<sub>2</sub>@MoO<sub>2</sub>-3, MoS<sub>2</sub>@MoO<sub>2</sub>-4 and MoS<sub>2</sub>@MoO<sub>2</sub>-5, respectively.

| Samples                               | Surface Area (m <sup>2</sup> g <sup>-1</sup> ) <sup>1)</sup> | Pore Volume (cm <sup>3</sup> g <sup>-1</sup> ) | Average pore Diameter (nm) |
|---------------------------------------|--------------------------------------------------------------|------------------------------------------------|----------------------------|
| MoO <sub>3</sub>                      | 10.3                                                         | 0.031                                          | 20.67                      |
| MoS <sub>2</sub> @MoO <sub>2</sub> -1 | 14.2                                                         | 0.068                                          | 27.23                      |
| MoS <sub>2</sub> @MoO <sub>2</sub> -2 | 15.0                                                         | 0.069                                          | 16.04                      |
| MoS <sub>2</sub> @MoO <sub>2</sub> -3 | 17.3                                                         | 0.040                                          | 14.28                      |
| MoS <sub>2</sub> @MoO <sub>2</sub> -4 | 20.5                                                         | 0.042                                          | 14.13                      |
| MoS <sub>2</sub> @MoO <sub>2</sub> -5 | 19.2                                                         | 0.040                                          | 14.54                      |

**Table S4.** The Li<sup>+</sup> diffusion coefficients of five electrode after 100 cycles.

| Sample                                | $\sigma_{\omega}(\Omega \text{ s}^{-0.5})$ | $D_{\text{K}^+}(\text{cm}^2 \text{ s}^{-1})$ |
|---------------------------------------|--------------------------------------------|----------------------------------------------|
| MoS <sub>2</sub> @MoO <sub>3</sub> -1 | 31.6                                       | $5.71 \cdot 10^{-13}$                        |
| MoS <sub>2</sub> @MoO <sub>3</sub> -2 | 24.1                                       | $9.82 \cdot 10^{-13}$                        |
| MoS <sub>2</sub> @MoO <sub>3</sub> -3 | 17.8                                       | $1.80 \cdot 10^{-12}$                        |
| MoS <sub>2</sub> @MoO <sub>3</sub> -4 | 17.0                                       | $1.98 \cdot 10^{-12}$                        |
| MoS <sub>2</sub> @MoO <sub>3</sub> -5 | 15.8                                       | $2.30 \cdot 10^{-12}$                        |
